# Supplementary material for: Individualized Prediction of Drug Response and Rational Combination Therapy in NSCLC Using Artificial Intelligence–Enabled Studies of Acute Phosphoproteomic Changes
Source: Mol Cancer Ther. 2022 Apr 3;21(6):1020–9. doi: 10.1158/1535-7163.MCT-21-0442 (PMC9381105; doi:10.1158/1535-7163.MCT-21-0442)
Supplement: Supplementary Table [file mct-21-0442_supplementary_table_1_suppst1.xlsx]

## Sheet: Supplementary Table 1 - Cell li
CellLine	Clincally-relevant mutations
H2228	ALK
H1755	BRAF
H2087	BRAF
H1650	EGFR
H1975	EGFR
H820	EGFR
HCC2935	EGFR
HCC4006	EGFR
HCC827	EGFR
PC9	EGFR
A549	KRAS
H1373	KRAS
H1734	KRAS
H1792	KRAS
H1944	KRAS
H2030	KRAS
H2122	KRAS
H2291	KRAS
H23	KRAS
H2347	KRAS
H358	KRAS
H441	KRAS
HCC44	KRAS
SKLU1	KRAS
CORL105
H1437
H1563
H1568
H1693
H1781
H1793
H1838
H1993
H3122
H522
