# Supplementary material for: Individualized Prediction of Drug Response and Rational Combination Therapy in NSCLC Using Artificial Intelligence–Enabled Studies of Acute Phosphoproteomic Changes
Source: Mol Cancer Ther. 2022 Apr 3;21(6):1020–9. doi: 10.1158/1535-7163.MCT-21-0442 (PMC9381105; doi:10.1158/1535-7163.MCT-21-0442)
Supplement: Supplementary Table [file mct-21-0442_supplementary_table_3_suppst3.xlsx]

## Sheet: Supplementary Table 2 - Environ
Node_name	A549_Luminespib	A549_Capivasertib	A549_Everolimus	A549_Pictilisib	A549_Gefitinib	A549_Trametinib	A549_Vemurafenib	CORL105_Luminespib	CORL105_Capivasertib	CORL105_Everolimus	CORL105_Pictilisib	CORL105_Gefitinib	CORL105_Trametinib	CORL105_Vemurafenib	H1373_Luminespib	H1373_Capivasertib	H1373_Everolimus	H1373_Pictilisib	H1373_Gefitinib	H1373_Trametinib	H1373_Vemurafenib	H1437_Luminespib	H1437_Capivasertib	H1437_Everolimus	H1437_Pictilisib	H1437_Gefitinib	H1437_Trametinib	H1437_Vemurafenib	H1563_Luminespib	H1563_Capivasertib	H1563_Everolimus	H1563_Pictilisib	H1563_Gefitinib	H1563_Trametinib	H1563_Vemurafenib	H1568_Luminespib	H1568_Capivasertib	H1568_Everolimus	H1568_Pictilisib	H1568_Gefitinib	H1568_Trametinib	H1568_Vemurafenib	H1650_Luminespib	H1650_Capivasertib	H1650_Everolimus	H1650_Pictilisib	H1650_Gefitinib	H1650_Trametinib	H1650_Vemurafenib
RPS6
GAPDH
FGFR3	2.1055	2.0437	2.2308	2.6653	2.5212	2.1412	3.3352	2.481	1.6228	2.8564	1.7737	1.2322	4.236	4.7308	1.5978	2.6485	0.8733	0.645	1.9425	1.3437	2.4534	6.3801	3.026	3.1335	3.9478	2.843	3.7247	4.0008	4.3532	2.7532	4.8629	3.4625	2.9804	3.2642	8.2675	2.843	1.6854	0.928	1.3342	1.9466	3.8157	1.7519	0.8827	1.7063	2.0393	1.2501	2.0192	2.0356	4.7046
FGFR2	1.9475	1.4998	1.5211	2.4413	2.288	1.6812	2.5269	1.3429	1.2827	1.8903	0.7878	1.507	3.0938	3.3947	2.1001	2.202	0.5974	0.7207	1.6403	0.6543	1.2255	4.6693	3.3308	2.6971	2.3654	2.5845	3.9869	4.2437	3.2122	2.1022	3.4546	1.8811	1.5773	1.8843	6.0531	2.1273	1.5024	1.0646	1.0238	0.8705	3.7761	1.5092	1.4652	2.2775	2.0817	1.8196	1.8921	4.0721	2.9314
p70S6K
MSK1
FLT3	0.8047	1.1294	0.638	0.2499	1.1986	0.5171	0.6291	0.2909	0.3737	0.878	0.5794	2.853	1.0008	0.5653	0.8039	0.2657	0.2976	1.0273	0.3424	0.7393	0.4651	1.926	0.8262	0.4705	1.0457	1.1231	0.5681	0.2575	2.8274	0.4097	2.6937	3.635	2.2669	2.7042	2.9797	0.5961	0.0601	0.4043	0.6368	1.9774	1.512	1.3397	0.5956	1.4215	0.319	0.1643	1.5665	0.7156	1.0108
PDGFRa	3.6937	4.3079	3.0407	2.4641	4.5792	2.7761	6.7007	1.6421	2.4767	4.8542	2.4716	6.1069	8.8119	5.4157	3.6909	3.0625	1.1037	2.8138	2.3775	3.0508	2.7598	9.6926	4.7169	4.3511	5.2308	7.2355	6.3282	5.4674	10.3293	3.734	9.257	9.9837	6.9864	7.4743	15.0651	5.4977	3.4801	2.6275	3.7897	6.2266	6.7012	5.7867	3.4974	4.4664	3.1483	3.3167	3.7143	6.628	6.3075
HER4	1.6734	2.2333	1.557	1.1776	2.1756	1.4043	4.323	1.3495	1.6295	3.0007	1.6336	1.9387	6.5137	3.4245	2.6414	1.6014	0.7367	1.8015	1.8696	1.4443	1.7612	5.271	2.4831	1.8863	2.2021	4.3747	3.6182	2.5049	4.4463	1.9336	3.1874	5.0716	3.6746	3.5614	5.7613	2.7137	3.1772	1.2183	1.8685	5.102	2.1968	3.6233	2.7222	1.7395	1.0916	2.1205	1.9702	3.2307	4.2171
JAK1	4.5904	3.9853	3.7476	2.7804	5.0928	3.312	6.1459	3.7554	4.0674	4.5963	3.5562	3.6381	11.0724	6.2671	5.1836	5.3459	2.5832	3.2278	4.0893	4.2923	3.4909	11.8056	4.9606	4.6811	5.4868	6.988	7.7504	5.6762	7.0355	2.8514	5.6461	7.2105	5.5367	6.4048	11.9286	4.7366	3.4665	2.9378	3.2491	3.8753	6.061	5.0763	3.9531	3.7979	3.8472	4.21	3.1347	6.6249	6.552
IR_panTYR
IR
RET	5.911	14.2223	3.0614	3.4139	3.7599	3.2236	6.2764	5.3211	13.3244	7.77	4.6402	10.9795	10.0699	7.6417	3.5593	8.4703	2.8219	4.0258	3.0575	5.4632	4.3986	9.1038	14.3342	5.0386	6.2494	6.8339	7.0435	5.9373	9.3747	11.9207	8.6986	10.5029	7.5154	6.9493	16.8571	5.1826	9.8617	2.8832	4.4421	6.0126	7.6694	5.3122	3.2825	11.1783	2.4534	4.3814	3.8366	3.8685	5.5048
HER3	4.504	4.4456	3.7354	3.1537	4.8485	3.4864	6.6565	3.045	2.7398	3.7231	3.4831	2.83	10.856	5.1414	4.3613	3.353	2.0715	2.7966	3.3902	3.0535	2.4019	8.6633	3.8525	3.8592	6.4787	6.3257	6.7479	6.0236	6.1922	2.4645	5.806	6.5385	4.5456	4.5597	9.9569	5.1778	4.5	2.9301	3.3829	6.2294	6.0701	5.4984	3.5892	2.4095	2.7022	5.1459	2.228	3.9404	6.635
HER2	9.0531	16.1832	5.1545	4.9888	7.2964	5.5104	10.1043	8.1877	14.0479	10.3495	7.2901	12.3442	18.6288	9.1009	6.3435	11.0563	2.9728	4.8307	5.9903	6.7119	4.8159	17.1785	15.7143	8.0206	10.016	10.8243	10.8942	7.6733	12.1134	14.4176	11.1339	13.0193	10.903	9.8804	22.0707	8.219	12.7861	4.8669	5.2353	9.6219	10.1285	7.704	6.0275	14.4952	5.3001	7.3397	5.0798	9.0547	11.6162
cMET	4.3484	3.3843	3.2594	4.4976	4.1059	3.561	6.5982	3.0317	2.3448	3.6889	2.8753	4.0276	8.9224	6.6882	3.4532	3.2056	1.6917	2.0898	2.683	2.6005	3.1827	8.2101	5.8369	4.2053	4.1886	5.9534	7.1237	5.6323	4.7631	2.3604	5.6185	6.2233	3.9039	4.1432	8.1753	5.073	3.2098	2.8815	3.3515	4.3902	7.2115	5.6481	2.4368	1.6361	2.8824	3.7878	2.5419	4.1986	7.4431
cKIT	1.1513	2.3733	1.4482	0.9766	1.8987	1.1478	2.344	0.5788	1.1752	2.3075	1.569	4.5	3.6458	2.9534	1.4758	1.4708	1.2263	1.9799	1.155	1.5573	2.1836	2.9873	2.084	1.6018	1.2569	2.3948	2.772	1.5452	3.2065	0.6944	3.4804	4.0636	2.8894	3.2141	4.1034	1.7157	1.5193	0.6216	1.4311	2.7988	2.9397	2.1344	1.3694	2.2402	1.1099	0.8787	2.1158	1.1483	2.6762
ERK2
CHK2	1.2953	0.4356	0.7771	1.1906	0.9611	1.0717	1.1916	0.4909	0.4308	1.2976	0.5596	0.7073	1.2085	1.0614	0.5669	0.7429	0.4316	0.5645	0.5186	0.4862	0.8691	1.9657	2.0998	1.6339	1.1763	1.5549	0.7825	1.4509	0.4417	0.6727	0.5644	0.8463	0.846	0.5656	1.4695	0.4581	0.2952	0.1762	0.411	0.6044	1.1847	0.8688	0.6427	0.8398	0.3295	0.4182	0.8914	0.7243	2.3704
Rb
NFkB
VEGFR2	2.8267	2.8271	2.0136	2.2464	3.1572	2.0247	3.9039	1.4415	1.6272	3.3977	2.7807	4.7414	4.7929	3.2783	1.5674	2.036	1.2866	2.1207	1.7594	2.3386	2.3741	5.932	4.2856	3.2039	2.763	3.8156	4.9328	2.3393	3.5487	1.0183	4.2883	5.084	3.4333	3.8547	6.0331	3.1789	1.4689	1.8108	2.3622	2.9864	4.9537	3.5555	1.2692	2.1555	2.128	1.6438	2.4427	2.4993	3.6568
PDGFRb	5.7951	5.8104	4.8087	5.1462	6.5964	4.7409	9.5271	3.242	3.9852	7.2372	3.9903	7.1427	12.6705	7.7935	5.247	4.8539	2.1894	3.736	3.5792	3.7869	4.4021	14.6843	9.5052	7.1322	8.4466	11.0773	11.0451	9.4561	10.9921	4.5236	11.1105	11.496	7.8278	8.8679	18.8643	8.366	5.0832	3.9062	5.3956	7.3221	10.6513	8.1947	4.6008	5.4488	4.0357	5.6638	4.8225	7.7937	9.6227
FGFR1	2.8471	4.7475	2.8553	2.2944	3.06	2.2121	4.7742	2.0513	2.7084	4.5933	3.0108	4.9175	6.8097	6.8675	3.6676	4.1889	2.584	3.1272	2.1912	3.3573	2.9196	8.8469	5.3012	4.7083	5.6184	6.2734	5.4254	4.4175	8.0467	1.9438	8.5959	9.2163	5.823	6.4758	13.3431	4.5854	2.8995	2.5274	3.5205	5.125	6.918	4.7503	2.6169	2.8486	2.573	2.2116	3.8639	2.9096	4.4562
STAT5A_B
STAT3
AXL
ERK_MAPK	8.5197	10.0475	7.5413	6.3611	9.2221	6.3575	11.8333	8.631	10.3322	11.9383	9.3004	11.528	21.7376	19.2426	12.6139	13.778	8.5951	10.4864	10.5011	11.784	15.9387	24.4625	14.8809	11.8661	15.5091	15.7026	15.5182	14.7055	21.6122	8.1118	21.7299	23.0756	13.5296	18.0757	34.6668	14.6915	9.4892	7.2563	12.2503	14.415	18.4607	17.2186	8.6817	9.5866	7.5062	8.82	9.0318	8.4849	16.167
cJUN
ATF2
AKT473	8.8961	13.8706	7.6515	7.4542	8.2385	6.8948	11.5891	9.4027	15.2603	13.9515	9.2574	8.4818	20.554	19.9514	12.2643	13.9376	8.0212	10.6228	8.5043	9.3086	14.3381	28.264	18.6795	12.1244	14.9348	14.284	13.7581	14.4285	23.2094	12.199	23.9725	21.692	12.4042	16.436	41.0836	14.9823	12.2713	6.8804	11.7603	11.663	19.0989	14.9125	8.3555	10.8496	5.4642	8.382	7.8696	7.5164	15.3939
TSC2
STAT1
SRC	12.7266	17.9457	8.415	9.9474	11.1325	9.0469	13.1403	11.6976	18.1683	15.2653	10.5931	15.5805	26.135	18.985	10.5916	15.0056	7.2668	8.4329	9.8018	11.8074	14.2849	25.3637	21.4244	13.8033	14.7885	14.9028	18.0712	17.5158	20.849	18.412	20.482	18.7345	13.9241	16.4819	36.7185	14.6141	16.3332	8.9994	10.4639	14.0736	19.65	16.4088	7.704	17.3873	8.2625	10.0484	7.7298	9.4262	18.6996
PTEN
PRAS40
PIK3CA	5.0257	11.2023	1.8097	1.9687	2.2419	2.0581	2.6997	3.9239	11.0392	5.471	3.4849	6.8286	7.3952	5.6601	2.2463	6.6345	1.8809	2.1322	2.2035	4.1284	4.3741	5.7758	10.581	3.7239	5.2979	2.9412	2.622	4.5256	3.1457	9.8642	4.7172	3.4145	3.0709	1.8053	11.7494	3.2028	8.495	3.2695	2.6435	3.0344	4.6737	2.2896	1.8174	10.3285	2.4112	2.607	1.4396	1.7083	3.7162
p53
p38	6.5889	14.691	2.9934	3.9479	4.0686	3.4093	5.9031	8.0392	14.4415	9.7694	6.4916	13.189	11.8392	12.6834	6.3529	13.0649	4.6873	5.8352	6.7586	9.8664	9.5029	12.5532	16.2385	7.3117	7.8049	8.4608	7.4267	8.0134	15.9256	15.7151	14.1996	16.3485	11.631	11.5984	24.788	8.0064	10.958	3.4853	6.7442	9.452	12.2459	9.2329	4.7657	14.5785	4.4445	5.1361	4.738	4.6212	10.6513
mTOR	8.2272	19.2158	4.7884	4.5148	5.2094	3.5323	9.1934	6.4976	18.0579	9.4688	7.4125	11.9351	12.9404	11.6521	6.4718	13.1375	4.998	9.2909	5.4641	7.4905	14.1154	17.1365	18.751	8.5155	10.6067	10.1397	7.5986	12.5692	15.4405	15.1368	17.7261	18.238	9.7661	10.9025	32.6993	12.2995	16.1705	9.9692	12.238	10.3258	14.5345	15.6645	5.6607	17.5917	4.761	5.7833	6.3287	4.8126	9.1363
MEK1	5.8306	14.3677	3.4703	3.7433	4.2173	3.2814	5.9981	5.5646	13.8243	8.6117	4.8691	10.4654	8.8278	9.0993	4.7265	9.1539	3.8138	4.9964	3.2954	7.2633	5.4025	11.6385	14.0344	6.167	6.2559	6.7263	5.6786	6.8118	14.9096	13.6321	13.1631	13.0857	8.9757	9.0015	23.283	5.8534	10.5093	2.3448	5.1015	7.6093	9.4084	5.9643	3.6599	12.7712	1.9423	3.7758	3.9103	3.5123	6.5402
LCK	6.7407	13.7195	3.7134	4.9032	4.9419	4.0657	7.1368	5.2392	13.211	8.5309	4.9664	11.3419	12.2796	9.417	3.898	8.429	3.3396	4.0614	3.4454	5.6454	5.0277	10.2781	14.2498	6.0408	6.2101	7.3754	7.5522	7.6738	10.1072	13.0043	9.5598	9.7992	7.9017	7.2193	18.1601	5.9175	10.4609	3.0053	4.0799	6.3755	9.1818	5.5103	3.3532	12.6225	3.3869	5.0985	3.9765	3.4247	7.9209
JNK	8.5831	16.2783	5.2047	5.9665	6.5653	5.0146	8.9594	8.9133	15.9324	10.0552	8.1593	14.0268	14.9008	14.3024	7.9386	13.9923	6.4734	7.7895	8.0863	10.4965	11.9746	15.6046	20.0818	10.1925	10.5693	10.7738	9.5658	11.2929	14.1007	14.9886	15.5435	16.4118	10.7189	10.7449	25.15	9.5855	12.674	5.7496	7.8224	10.5142	14.4148	9.4889	5.5949	15.6969	5.4733	7.3741	5.6351	5.0084	13.4455
IRS1
IGF1R_panTYR	6.1181	13.7928	3.2595	2.9211	4.5233	2.9662	6.8352	6.1192	13.8469	7.7131	4.123	8.1902	12.2206	5.9715	4.7514	8.5933	2.217	3.0633	2.6734	4.6604	2.9079	9.6446	12.1592	3.5919	5.8476	6.5591	5.0909	4.2225	7.1136	11.978	5.6399	7.4285	6.5698	6.5979	12.7707	4.0327	8.8552	2.8725	3.1921	4.8839	4.8856	3.7375	3.8744	10.9483	2.313	4.6319	3.1508	6.6471	6.9153
IGF1R	6.4001	13.8079	3.4683	3.1802	4.8683	3.2792	6.9474	6.08	13.9539	8.0231	4.0474	8.3339	11.4241	6.2668	4.731	8.8998	2.2866	3.2652	3.0587	4.6272	3.1402	10.0342	12.5177	4.133	5.7731	6.2186	4.9113	4.1822	6.8008	12.1175	5.7171	7.4043	6.4045	6.3585	13.288	4.3246	9.291	2.8084	3.2217	4.8358	5.5649	3.9006	3.6573	11.0472	2.5448	4.557	3.0782	6.4968	6.4879
HSP90	6.2668	13.6461	3.3889	4.085	3.5777	3.7348	6.0644	6.4505	12.6586	8.2699	3.7634	9.191	10.5671	9.3477	4.585	9.6461	2.28	2.7839	3.695	4.5496	7.4661	11.4261	14.2465	4.9656	6.0687	7.1376	6.4117	5.6201	8.8091	12.7141	8.1086	9.1742	7.5449	6.9831	16.8588	5.2472	10.725	2.6563	4.2777	5.8714	6.5529	5.7222	4.0738	10.519	2.9372	3.5609	3.9418	4.8417	8.728
HSP27_total
HSP27
GSK3B	8.5183	19.5296	5.4141	5.8719	5.1495	4.1992	8.4236	7.5971	17.7796	12.6518	7.3389	12.0596	13.9101	15.5691	9.1429	16.0788	6.1557	9.5365	6.0572	9.4281	18.4415	20.8066	19.5896	10.7477	12.9965	11.6465	9.333	11.9595	20.2314	16.2407	23.1892	19.9787	11.2112	14.6106	37.92	14.6932	16.0187	11.1713	11.4815	10.3494	15.2794	16.807	7.3915	17.3233	4.5436	7.0513	7.7742	4.4569	12.6874
GSK3a
FAK
EGFR	10.5952	17.6838	6.6708	7.2969	8.9248	6.9304	12.0839	10.4369	16.8042	13.3201	9.4498	14.2134	22.4556	15.1004	9.5188	14.2507	5.7761	7.4771	8.5137	10.6737	8.3751	22.332	20.4645	11.7432	13.006	14.0426	15.5678	11.9461	16.7279	16.6239	16.029	17.1628	13.3973	12.6684	29.6906	11.144	14.4859	5.966	7.6878	12.3133	16.2744	11.0169	7.3814	17.067	6.895	9.2083	6.5957	10.8636	14.5046
cRAF	7.986	15.7406	4.3682	4.7617	6.5335	4.2594	9.4759	6.4971	15.839	11.2281	6.7814	12.2485	14.501	9.6502	5.855	10.7074	4.5878	5.1235	4.7965	8.8234	6.0728	14.6328	15.8845	7.7467	8.003	9.5862	8.4197	7.2797	12.6904	13.7104	11.7946	13.3678	10.216	10.6454	22.185	7.5315	10.7195	4.0464	5.9814	8.16	11.754	8.29	4.9691	14.6097	3.7788	6.5605	4.8904	7.4839	8.684
CHK1	4.807	11.5726	2.0983	3.0359	2.457	2.4712	3.6398	4.5524	11.7681	5.9472	3.2595	6.5088	6.2268	3.6877	2.3693	6.5768	1.911	2.318	1.9103	4.547	2.9717	5.728	11.532	4.1102	3.8757	3.1354	3.063	3.0468	4.8954	11.4989	5.0516	4.3134	3.1919	3.2938	10.4159	2.67	8.4448	1.3364	2.4705	4.1134	5.0841	2.8785	1.7117	10.6377	0.7609	2.3276	1.9309	1.7915	4.7956
BRAF	3.8822	11.0047	1.0169	1.7334	1.6857	1.3886	1.7345	4.058	10.9153	5.3476	2.9157	7.8769	4.1311	2.5278	1.8969	5.6684	1.744	2.4854	1.2412	4.8323	1.9019	3.2022	9.9024	3.0659	2.1685	1.9306	1.6289	1.9998	7.1455	10.6624	6.7194	6.0246	4.9312	4.8055	12.1244	2.5525	7.6851	1.1091	2.4647	3.8546	5.3657	2.9666	1.3708	11.1442	0.6584	1.8823	1.3671	0.9359	2.6046
bCATENIN
AKT308	9.2369	15.5787	7.4258	7.9834	8.0909	6.9271	11.068	9.9208	17.1707	13.4376	8.5582	9.1139	21.2763	20.0823	12.0666	17.3087	8.034	10.5765	8.6407	10.6801	14.0537	27.1583	19.8821	12.0709	15.1809	15.0898	14.1165	14.9674	23.532	13.5738	23.3715	21.7051	13.5194	16.3885	41.3541	14.8833	15.6502	7.1252	11.538	11.9487	18.4832	14.8943	8.3178	15.3252	5.4517	8.417	7.8338	7.4006	15.1047
[truncated: 196 more columns]
