# Supplementary material for: Individualized Prediction of Drug Response and Rational Combination Therapy in NSCLC Using Artificial Intelligence–Enabled Studies of Acute Phosphoproteomic Changes
Source: Mol Cancer Ther. 2022 Apr 3;21(6):1020–9. doi: 10.1158/1535-7163.MCT-21-0442 (PMC9381105; doi:10.1158/1535-7163.MCT-21-0442)
Supplement: Supplementary Table [file mct-21-0442_supplementary_table_4_suppst4.xlsx]

## Sheet: Sheet1
Method	CellLine	Drug1	Drug2	Bliss score	Phosphoprotein	Rank
totalperturbation	HCC827	Trametinib	Capivasertib	0.6	AKT308	3
totalperturbation	HCC827	Trametinib	Capivasertib	0.6	AKT473	2
totalperturbation	HCC827	Capivasertib	Trametinib	0.6	MEK1	14
totalperturbation	PC9	Trametinib	Capivasertib	0.49	AKT308	3
totalperturbation	PC9	Trametinib	Capivasertib	0.49	AKT473	3
totalperturbation	PC9	Capivasertib	Trametinib	0.49	MEK1	14
totalperturbation	PC9	Trametinib	Gefitinib	0.44	EGFR	5
totalperturbation	PC9	Gefitinib	Trametinib	0.44	MEK1	16
totalperturbation	PC9	Vemurafenib	Gefitinib	0.42	EGFR	3
totalperturbation	H522	Trametinib	Everolimus	0.4	mTOR	10
totalperturbation	H522	Everolimus	Trametinib	0.4	MEK1	18
totalperturbation	H1944	Gefitinib	Capivasertib	0.39	AKT308	6
totalperturbation	H1944	Gefitinib	Capivasertib	0.39	AKT473	4
totalperturbation	H1944	Capivasertib	Gefitinib	0.39	EGFR	8
totalperturbation	HCC827	Vemurafenib	Trametinib	0.38	MEK1	21
totalperturbation	H1568	Trametinib	Capivasertib	0.35	AKT308	3
totalperturbation	H1568	Trametinib	Capivasertib	0.35	AKT473	2
totalperturbation	H1568	Capivasertib	Trametinib	0.35	MEK1	12
totalperturbation	H1944	Luminespib	Everolimus	0.33	mTOR	4
totalperturbation	PC9	Luminespib	Capivasertib	0.32	AKT308	4
totalperturbation	PC9	Luminespib	Capivasertib	0.32	AKT473	4
totalperturbation	H522	Vemurafenib	Capivasertib	0.32	AKT308	4
totalperturbation	H522	Vemurafenib	Capivasertib	0.32	AKT473	2
totalperturbation	H1568	Gefitinib	Everolimus	0.3	mTOR	6
totalperturbation	H1568	Everolimus	Gefitinib	0.3	EGFR	5
totalperturbation	H1568	Vemurafenib	Gefitinib	0.3	EGFR	7
totalperturbation	H1792	Trametinib	Gefitinib	0.3	EGFR	5
totalperturbation	H1792	Gefitinib	Trametinib	0.3	MEK1	17
totalperturbation	PC9	Gefitinib	Everolimus	0.3	mTOR	2
totalperturbation	PC9	Everolimus	Gefitinib	0.3	EGFR	6
totalperturbation	H522	Luminespib	Capivasertib	0.3	AKT308	7
totalperturbation	H522	Luminespib	Capivasertib	0.3	AKT473	6
totalperturbation	PC9	Everolimus	Capivasertib	0.29	AKT308	2
totalperturbation	PC9	Everolimus	Capivasertib	0.29	AKT473	1
totalperturbation	PC9	Capivasertib	Everolimus	0.29	mTOR	2
totalperturbation	H1792	Gefitinib	Capivasertib	0.28	AKT308	5
totalperturbation	H1792	Gefitinib	Capivasertib	0.28	AKT473	6
totalperturbation	H1792	Capivasertib	Gefitinib	0.28	EGFR	8
totalperturbation	H522	Everolimus	Capivasertib	0.28	AKT308	4
totalperturbation	H522	Everolimus	Capivasertib	0.28	AKT473	3
totalperturbation	H522	Pictilisib	Trametinib	0.28	MEK1	19
totalperturbation	H522	Capivasertib	Everolimus	0.28	mTOR	2
totalperturbation	HCC827	Pictilisib	Trametinib	0.27	MEK1	23
totalperturbation	H522	Trametinib	Capivasertib	0.27	AKT308	4
totalperturbation	H522	Trametinib	Capivasertib	0.27	AKT473	6
totalperturbation	H522	Capivasertib	Trametinib	0.27	MEK1	9
totalperturbation	H522	Pictilisib	Everolimus	0.27	mTOR	1
totalperturbation	HCC827	Trametinib	Gefitinib	0.25	EGFR	6
totalperturbation	HCC827	Gefitinib	Trametinib	0.25	MEK1	24
totalperturbation	H1568	Gefitinib	Capivasertib	0.24	AKT308	4
totalperturbation	H1568	Gefitinib	Capivasertib	0.24	AKT473	5
totalperturbation	H1568	Capivasertib	Gefitinib	0.24	EGFR	6
totalperturbation	H1792	Gefitinib	Everolimus	0.24	mTOR	16
totalperturbation	H1792	Luminespib	Trametinib	0.24	MEK1	10
totalperturbation	H1792	Everolimus	Gefitinib	0.24	EGFR	8
totalperturbation	H1792	Luminespib	Capivasertib	0.24	AKT308	3
totalperturbation	H1792	Luminespib	Capivasertib	0.24	AKT473	2
totalperturbation	H1944	Vemurafenib	Gefitinib	0.24	EGFR	7
totalperturbation	H1568	Everolimus	Capivasertib	0.22	AKT308	4
totalperturbation	H1568	Everolimus	Capivasertib	0.22	AKT473	6
totalperturbation	H1568	Capivasertib	Everolimus	0.22	mTOR	1
totalperturbation	H1568	Vemurafenib	Capivasertib	0.21	AKT308	4
totalperturbation	H1568	Vemurafenib	Capivasertib	0.21	AKT473	4
totalperturbation	H1568	Trametinib	Everolimus	0.2	mTOR	5
totalperturbation	H1568	Everolimus	Trametinib	0.2	MEK1	23
totalperturbation	H1568	Luminespib	Capivasertib	0.2	AKT308	2
totalperturbation	H1568	Luminespib	Capivasertib	0.2	AKT473	2
totalperturbation	H1568	Pictilisib	Capivasertib	0.2	AKT308	2
totalperturbation	H1568	Pictilisib	Capivasertib	0.2	AKT473	2
totalperturbation	H1792	Trametinib	Capivasertib	0.2	AKT308	6
totalperturbation	H1792	Trametinib	Capivasertib	0.2	AKT473	3
totalperturbation	H1792	Capivasertib	Trametinib	0.2	MEK1	13
totalperturbation	H1944	Trametinib	Capivasertib	0.2	AKT308	8
totalperturbation	H1944	Trametinib	Capivasertib	0.2	AKT473	9
totalperturbation	H1944	Everolimus	Capivasertib	0.2	AKT308	3
totalperturbation	H1944	Everolimus	Capivasertib	0.2	AKT473	4
totalperturbation	H1944	Capivasertib	Trametinib	0.2	MEK1	14
totalperturbation	H1944	Vemurafenib	Trametinib	0.2	MEK1	10
totalperturbation	H1944	Capivasertib	Everolimus	0.2	mTOR	2
totalperturbation	HCC827	Trametinib	Everolimus	0.2	mTOR	5
totalperturbation	HCC827	Everolimus	Trametinib	0.2	MEK1	18
totalperturbation	HCC827	Vemurafenib	Gefitinib	0.2	EGFR	3
totalperturbation	PC9	Vemurafenib	Capivasertib	0.2	AKT308	7
totalperturbation	PC9	Vemurafenib	Capivasertib	0.2	AKT473	5
totalperturbation	PC9	Pictilisib	Everolimus	0.2	mTOR	4
totalperturbation	H522	Gefitinib	Capivasertib	0.2	AKT308	9
totalperturbation	H522	Gefitinib	Capivasertib	0.2	AKT473	8
totalperturbation	H522	Capivasertib	Gefitinib	0.2	EGFR	5
totalperturbation	H1792	Vemurafenib	Capivasertib	0.19	AKT308	4
totalperturbation	H1792	Vemurafenib	Capivasertib	0.19	AKT473	3
totalperturbation	HCC827	Gefitinib	Everolimus	0.19	mTOR	1
totalperturbation	HCC827	Everolimus	Gefitinib	0.19	EGFR	10
totalperturbation	HCC827	Vemurafenib	Capivasertib	0.18	AKT308	4
totalperturbation	HCC827	Vemurafenib	Capivasertib	0.18	AKT473	5
totalperturbation	PC9	Pictilisib	Trametinib	0.18	MEK1	18
totalperturbation	H1568	Pictilisib	Everolimus	0.17	mTOR	1
totalperturbation	H1568	Vemurafenib	Trametinib	0.16	MEK1	13
totalperturbation	H1792	Luminespib	Everolimus	0.16	mTOR	7
totalperturbation	HCC827	Pictilisib	Capivasertib	0.16	AKT308	5
totalperturbation	HCC827	Pictilisib	Capivasertib	0.16	AKT473	3
totalperturbation	H522	Vemurafenib	Everolimus	0.16	mTOR	5
totalperturbation	H1944	Pictilisib	Capivasertib	0.15	AKT308	5
totalperturbation	H1944	Pictilisib	Capivasertib	0.15	AKT473	4
totalperturbation	PC9	Vemurafenib	Everolimus	0.15	mTOR	17
totalperturbation	H1792	Trametinib	Everolimus	0.14	mTOR	7
totalperturbation	H1792	Everolimus	Trametinib	0.14	MEK1	16
totalperturbation	H1944	Vemurafenib	Everolimus	0.14	mTOR	1
totalperturbation	HCC827	Luminespib	Everolimus	0.14	mTOR	2
totalperturbation	H1792	Pictilisib	Everolimus	0.12	mTOR	2
totalperturbation	PC9	Gefitinib	Capivasertib	0.12	AKT308	4
totalperturbation	PC9	Gefitinib	Capivasertib	0.12	AKT473	3
totalperturbation	PC9	Capivasertib	Gefitinib	0.12	EGFR	8
totalperturbation	HCC827	Luminespib	Capivasertib	0.11	AKT308	8
totalperturbation	HCC827	Luminespib	Capivasertib	0.11	AKT473	10
totalperturbation	H1568	Trametinib	Gefitinib	0.1	EGFR	8
totalperturbation	H1568	Gefitinib	Trametinib	0.1	MEK1	13
totalperturbation	H1568	Vemurafenib	Everolimus	0.1	mTOR	1
totalperturbation	H1792	Everolimus	Capivasertib	0.1	AKT308	4
totalperturbation	H1792	Everolimus	Capivasertib	0.1	AKT473	4
totalperturbation	H1792	Capivasertib	Everolimus	0.1	mTOR	5
totalperturbation	H1944	Gefitinib	Everolimus	0.1	mTOR	15
totalperturbation	H1944	Vemurafenib	Capivasertib	0.1	AKT308	5
totalperturbation	H1944	Vemurafenib	Capivasertib	0.1	AKT473	4
totalperturbation	H1944	Everolimus	Gefitinib	0.1	EGFR	8
totalperturbation	H1944	Pictilisib	Everolimus	0.1	mTOR	3
totalperturbation	PC9	Pictilisib	Capivasertib	0.1	AKT308	3
totalperturbation	PC9	Pictilisib	Capivasertib	0.1	AKT473	2
totalperturbation	H522	Luminespib	Trametinib	0.1	MEK1	17
totalperturbation	H1792	Vemurafenib	Everolimus	0.09	mTOR	11
totalperturbation	H1792	Pictilisib	Capivasertib	0.09	AKT308	5
totalperturbation	H1792	Pictilisib	Capivasertib	0.09	AKT473	4
totalperturbation	HCC827	Everolimus	Capivasertib	0.09	AKT308	7
totalperturbation	HCC827	Everolimus	Capivasertib	0.09	AKT473	6
totalperturbation	HCC827	Capivasertib	Everolimus	0.09	mTOR	2
totalperturbation	H522	Trametinib	Gefitinib	0.09	EGFR	2
totalperturbation	H522	Gefitinib	Trametinib	0.09	MEK1	11
totalperturbation	H1568	Pictilisib	Trametinib	0.08	MEK1	11
totalperturbation	H1792	Vemurafenib	Gefitinib	0.08	EGFR	2
totalperturbation	HCC827	Pictilisib	Everolimus	0.08	mTOR	2
totalperturbation	H522	Vemurafenib	Gefitinib	0.08	EGFR	6
totalperturbation	H1792	Pictilisib	Trametinib	0.07	MEK1	18
totalperturbation	H1944	Pictilisib	Trametinib	0.07	MEK1	14
totalperturbation	PC9	Luminespib	Everolimus	0.07	mTOR	6
totalperturbation	H1944	Trametinib	Gefitinib	0.06	EGFR	4
totalperturbation	H1944	Gefitinib	Trametinib	0.06	MEK1	10
totalperturbation	PC9	Vemurafenib	Trametinib	0.05	MEK1	21
totalperturbation	HCC827	Vemurafenib	Everolimus	0.04	mTOR	13
totalperturbation	PC9	Trametinib	Everolimus	0.04	mTOR	11
totalperturbation	PC9	Everolimus	Trametinib	0.04	MEK1	16
totalperturbation	H1944	Trametinib	Everolimus	0.03	mTOR	6
totalperturbation	H1944	Everolimus	Trametinib	0.03	MEK1	12
totalperturbation	HCC827	Gefitinib	Capivasertib	0.03	AKT308	7
totalperturbation	HCC827	Gefitinib	Capivasertib	0.03	AKT473	6
totalperturbation	HCC827	Capivasertib	Gefitinib	0.03	EGFR	5
totalperturbation	PC9	Luminespib	Trametinib	0.03	MEK1	18
totalperturbation	H1568	Luminespib	Everolimus	0.02	mTOR	4
totalperturbation	HCC827	Luminespib	Trametinib	0.02	MEK1	17
totalperturbation	H522	Vemurafenib	Trametinib	0.01	MEK1	19
totalperturbation	H522	Pictilisib	Capivasertib	0.01	AKT308	6
totalperturbation	H522	Pictilisib	Capivasertib	0.01	AKT473	5
totalperturbation	H1568	Luminespib	Trametinib	0	MEK1	14
totalperturbation	H1792	Vemurafenib	Trametinib	0	MEK1	19
totalperturbation	H1944	Luminespib	Trametinib	0	MEK1	18
totalperturbation	H1944	Luminespib	Capivasertib	0	AKT308	7
totalperturbation	H1944	Luminespib	Capivasertib	0	AKT473	8
totalperturbation	H522	Gefitinib	Everolimus	0	mTOR	10
totalperturbation	H522	Everolimus	Gefitinib	0	EGFR	5
totalperturbation	H522	Luminespib	Everolimus	0	mTOR	16
